# Supplementary material
Source: publisher figshare collection journal article supplement (https://acs.figshare.com/ndownloader/files/3975928)

## S1 Supporting Information Contents Page

**Title:** Antioxidant and tyrosinase inhibitory activities of flavonoids from *Trifolium nigrescens* subsp. *petrisavi*

**Authors:** Ozlem Demirkiran<sup>a,†</sup>, Temine Sabudak<sup>b</sup>, Mehmet Öztürk<sup>c</sup>, Gülaçtı Topçu<sup>d</sup>

### Addresses:

<sup>a</sup>*Department of Pharmacognosy, Faculty of Pharmacy, Trakya University, 22030, Edirne, Turkey*

<sup>b</sup>*Department of Chemistry, Faculty of Science and Letters, Namik Kemal University, 59860, Tekirdag, Turkey*

<sup>c</sup>*Department of Chemistry, Faculty of Science, Mugla Sıtkı Koçman University, 48121, Mugla, Turkey*

<sup>d</sup>*Department of Pharmacognosy, Faculty of Pharmacy, Bezmialem Vakıf University, 34093, Istanbul, Turkey*

**Corresponding author contact details:** Tel. +90-284-2359592-1232. Fax: +90-284-2361544. E-mail: [ozlemdemirkiran@yahoo.com](mailto:ozlemdemirkiran@yahoo.com), [ozlemdemirkiran@trakya.edu.tr](mailto:ozlemdemirkiran@trakya.edu.tr)

**Contents:**

**S2**  $^1\text{H}$  NMR Spectrum of compound **1** in  $\text{CD}_3\text{OD}$  (300 MHz)

**S3** HMQC Spectrum of compound **1** in  $\text{CD}_3\text{OD}$  (300 MHz)

**S4** HMBC Spectrum of compound **1** in  $\text{CD}_3\text{OD}$  (300 MHz)

**S5** COSY Spectrum of compound **1** in  $\text{CD}_3\text{OD}$  (300 MHz)

**S6** NOESY Spectrum of compound **1** in  $\text{CD}_3\text{OD}$  (300 MHz)

## S2 $^1\text{H}$ NMR Spectrum of compound **1** in $\text{CD}_3\text{OD}$ (300 MHz)

A.TPE.160.15\_03Apr2011

Archive directory: /export/home/vnmr1/vnmrsys/data  
Sample directory: A.TPE.160.15\_03Apr2011

Pulse Sequence: s2pul

Solvent:  $\text{CD}_3\text{OD}$   
Temp. 20.0 C / 293.1 K  
File: PROTON  
Mercury-300BB "Tahir"

Relax. delay 1.000 sec  
Pulse 45.0 degrees  
Acq. time 1.998 sec  
Width 4798.5 Hz  
8 repetitions  
OBSERVE H1, 299.9473821 MHz  
DATA PROCESSING  
FT size 32768  
Total time 0 min, 25 sec

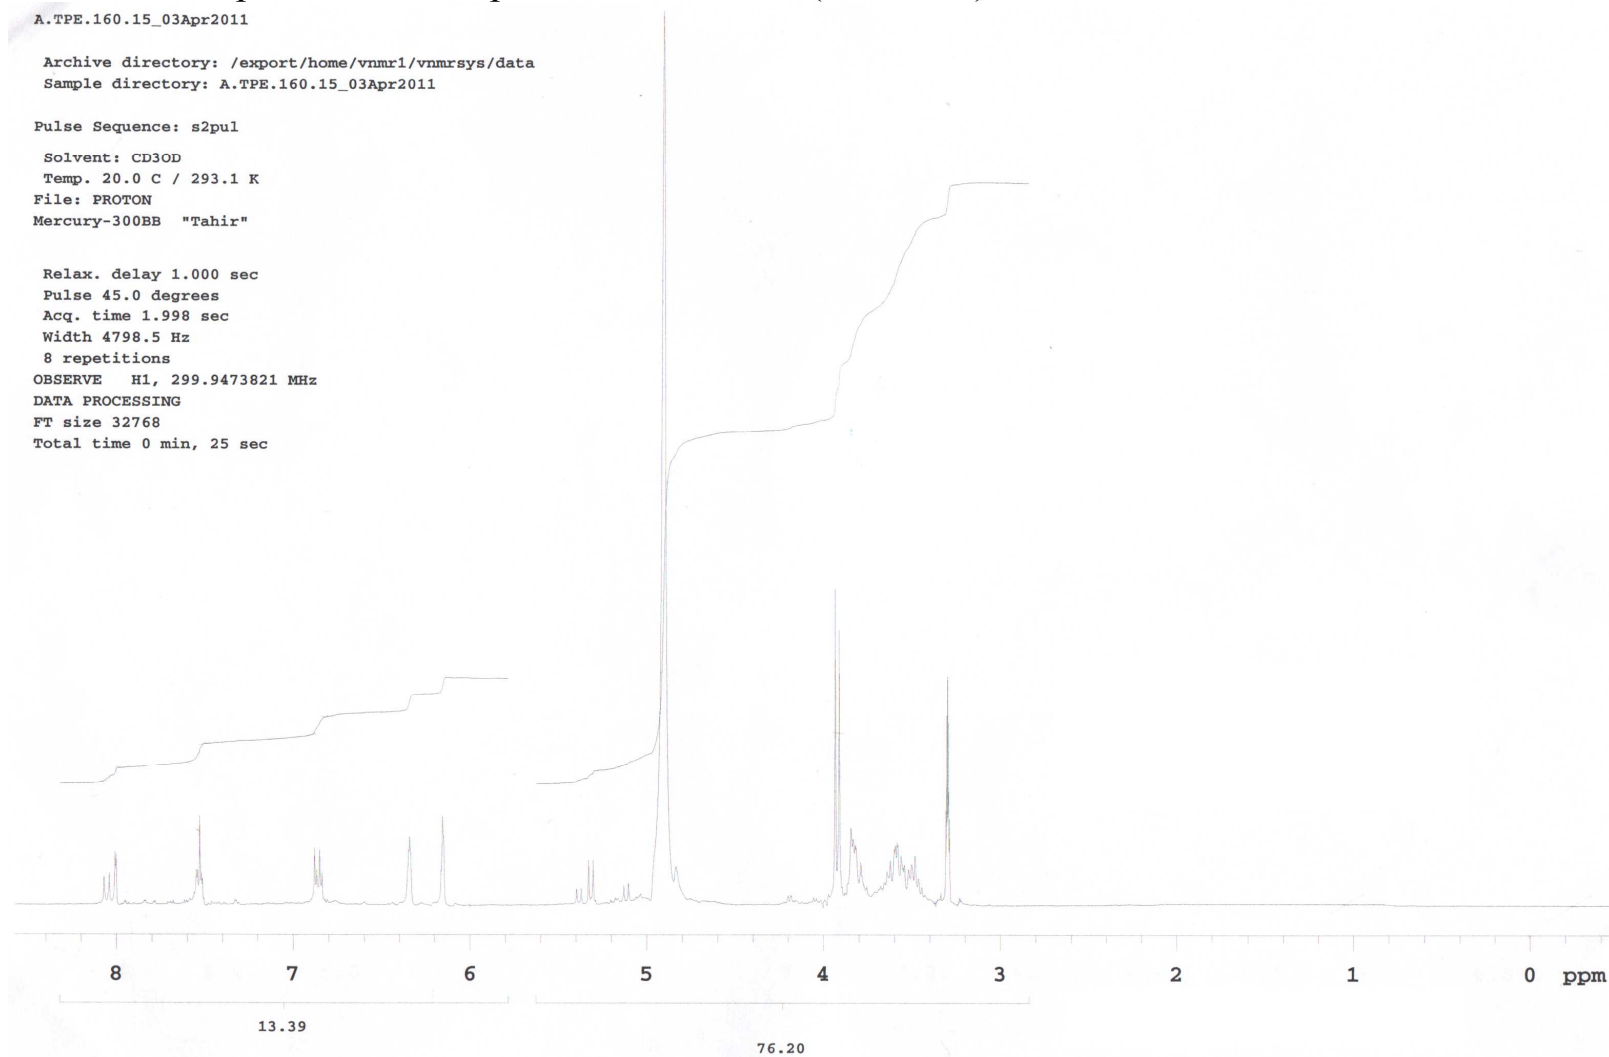

### S3 HMQC Spectrum of compound **1** in CD<sub>3</sub>OD (300 MHz)

A.TPE.160.15\_03Apr2011

Archive directory: /export/home/vnmr1/vnmrsys/data  
Sample directory: A.TPE.160.15\_03Apr2011

Pulse Sequence: gHSQC

Solvent: CD3OD  
Temp. 20.0 C / 293.1 K  
File: gHSQC  
Mercury-300BB "Tahir"

Relax. delay 1.000 sec  
Acq. time 0.213 sec  
Width 4798.5 Hz  
2D Width 12820.5 Hz  
32 repetitions  
2 x 512 increments  
OBSERVE H1, 299.9473821 MHz  
DECOUPLE C13, 75.4274678 MHz  
Power 47 dB  
on during acquisition  
off during delay  
GARP-1 modulated  
DATA PROCESSING  
Gauss apodization 0.099 sec  
F1 DATA PROCESSING  
Gauss apodization 0.074 sec  
FT size 2048 x 8192  
Total time 12 hr, 16 min, 11 sec

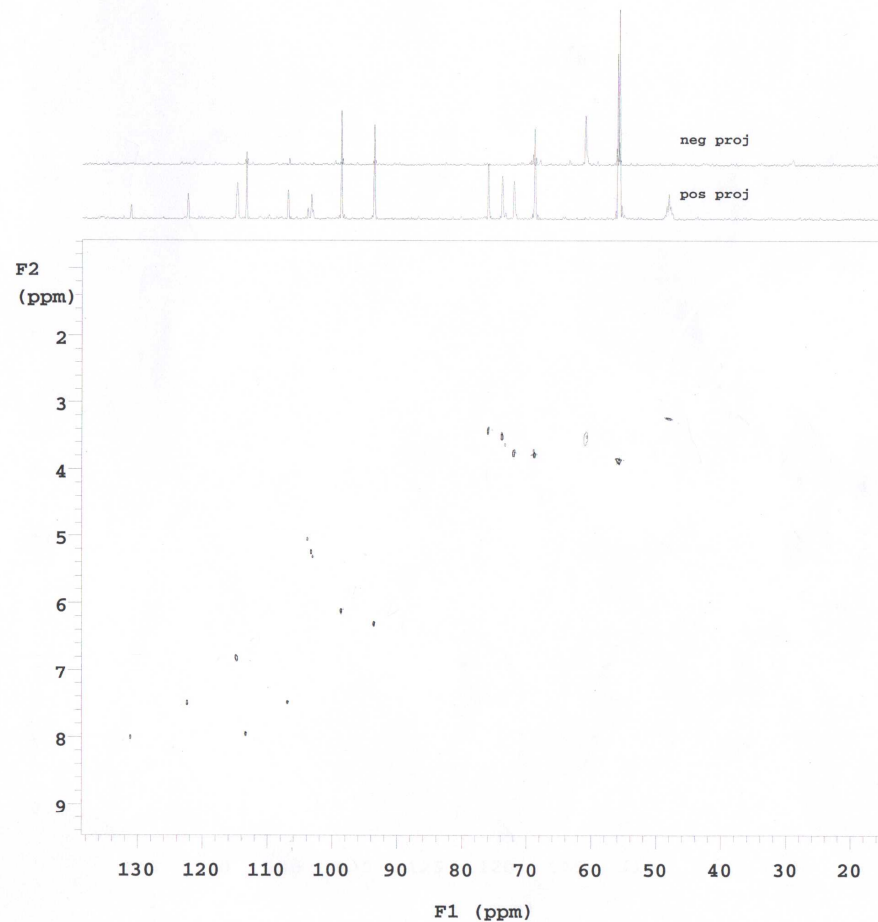

## S4 HMBC Spectrum of compound **1** in CD<sub>3</sub>OD (300 MHz)

A.TPE.160.15\_03Apr2011

Archive directory: /export/home/vnmr1/vnmrsys/data  
Sample directory: A.TPE.160.15\_03Apr2011

Pulse Sequence: gHMBC

Solvent: CD3OD

Temp. 20.0 C / 293.1 K

File: gHMBC

Mercury-300BB "Tahir"

Relax. delay 1.000 sec

Acq. time 0.213 sec

Width 4798.5 Hz

2D Width 18115.9 Hz

32 repetitions

512 increments

OBSERVE H1, 299.9473821 MHz

DATA PROCESSING

Sine bell 0.107 sec

FL DATA PROCESSING

Sine bell 0.014 sec

FT size 2048 x 2048

Total time 6 hr, 10 min, 34 sec

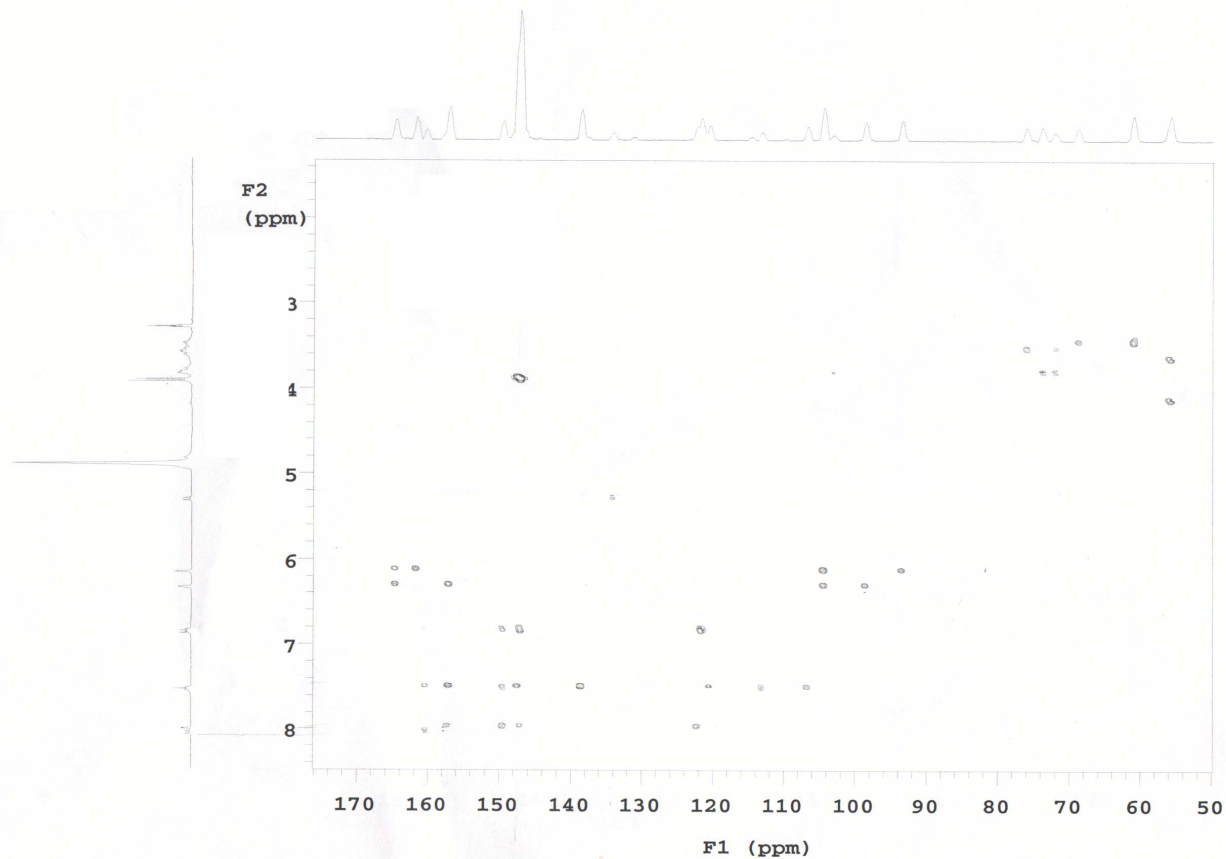

**S5 COSY Spectrum of compound 1 in CD<sub>3</sub>OD (300 MHz)**

A.TPE.160.15\_03Apr2011

```
Archive directory: /export/home/vnmr1/vnmrsys/data
Sample directory: A.TPE.160.15_03Apr2011
```

Pulse Sequence: gCOSY

Solvent: CD3OD

Temp. 20.0 C / 293.1 K

File: gCOSY

Mercury-300BB "Tahir"

Relax. delay 1.000 sec

Acq. time 0.213 sec

Width 4798.5 Hz

2D Width 4798.5 Hz

2 repetitions

512 increments

OBSERVE H1, 299.9473821 MHz

## DATA PROCESSING

Sq. sine bell 0.107 sec

F1 DATA PROCESSING

Sq. sine bell 0.107 sec

FT size 4096 x 4096

Total time 25 min, 42 sec

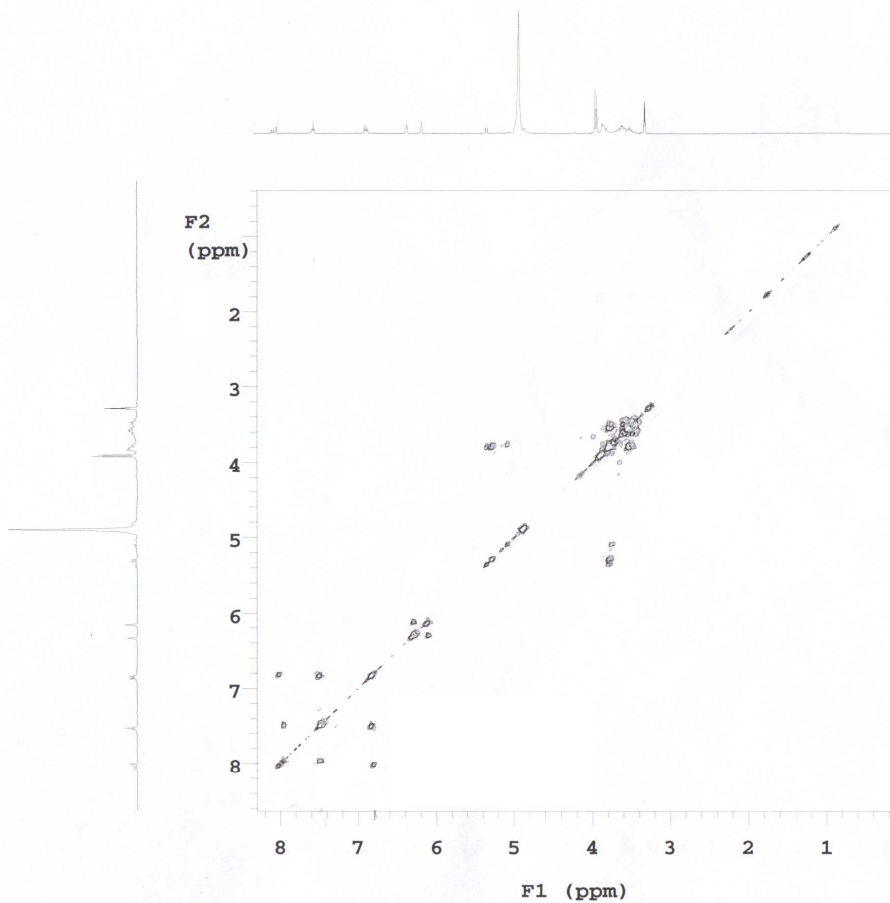

## S6 NOESY Spectrum of compound **1** in CD<sub>3</sub>OD (300 MHz)

A.TPE.160.15\_03Apr2011

Archive directory: /export/home/vnmr1/vnmrsys/data  
Sample directory: A.TPE.160.15\_03Apr2011

Pulse Sequence: NOESY

Solvent: CD3OD  
Temp. 20.0 C / 293.1 K  
File: NOESY  
Mercury-300BB "Tahir"

Relax. delay 1.000 sec  
Mixing 0.200 sec  
Acq. time 0.213 sec  
Width 4798.5 Hz  
2D Width 4798.5 Hz  
16 repetitions  
2 x 256 increments  
OBSERVE H1, 299.9473821 MHz  
DATA PROCESSING  
Gauss apodization 0.099 sec  
F1 DATA PROCESSING  
Gauss apodization 0.049 sec  
FT size 2048 x 2048  
Total time 3 hr, 25 min, 31 sec

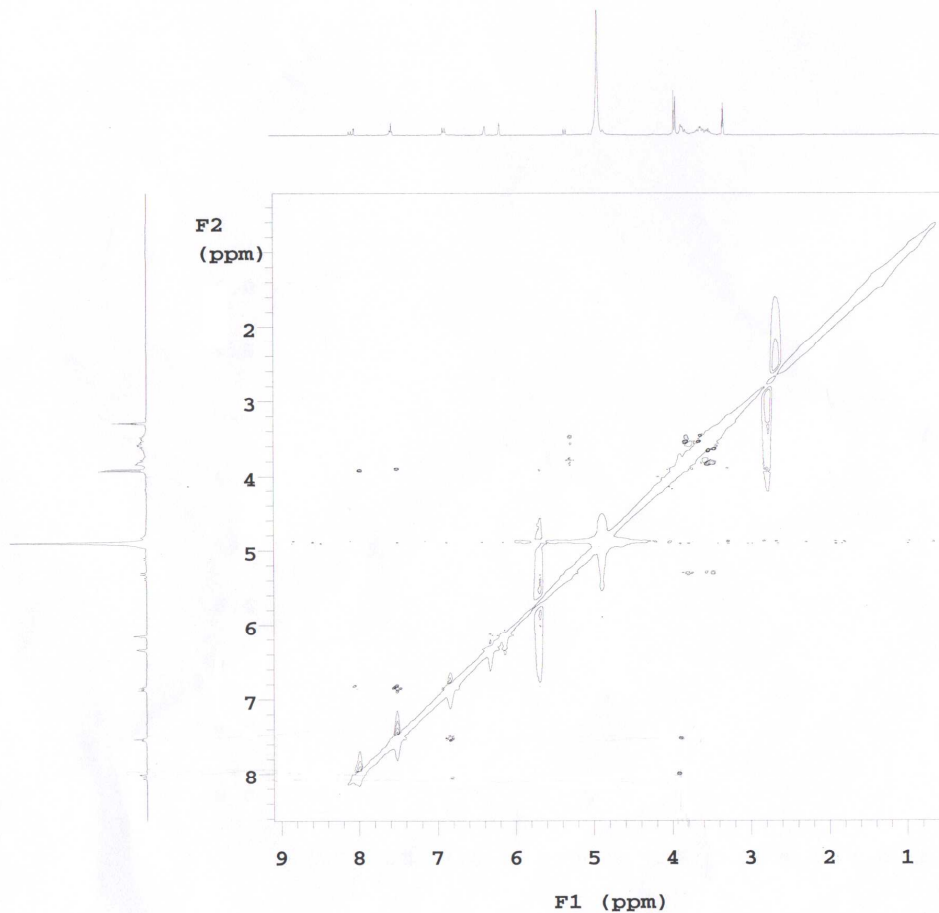

Supplement: Supplementary file 1 [file 3975928]
